# Supplementary material
Source: publisher figshare collection journal article supplement (https://sage.figshare.com/ndownloader/files/14489408)
Supplement: Supplementary file 1 [file 14489408]

**Yoram Z. Haftel & Stephanie C. Hofmann. Forthcoming. "Rivalry and Overlap:  
Why Regional Economic Organizations Encroach on Security Organizations."  
Journal of Conflict Resolution**

**Variables Information Sheet**

| <b>Name of variable in Stata</b> | <b>Name of variable in Article</b> | <b>Content</b>                                                                                                             |
|----------------------------------|------------------------------------|----------------------------------------------------------------------------------------------------------------------------|
| year                             | N/A                                | Year in which security cooperation is coded                                                                                |
| region                           | N/A                                | Name of REO's region                                                                                                       |
| nregion                          | N/A                                | Nominal value of REO's region                                                                                              |
| nbloc                            | N/A                                | Nominal value of REO                                                                                                       |
| bloc                             | N/A                                | REO's acronym                                                                                                              |
| desecurity2                      | REO SECURITY DEPTH                 | Ordinal DV: 0 (no), 1 (low), 2 (high) security cooperation                                                                 |
| desecurity_01L                   | REO SECURITY COOPERATION           | Dummy DV: 0 (no), 1 (yes) security cooperation                                                                             |
| rso_1                            | RSO OVERLAP                        | 1 if REO has an overlapping RSO, 0 otherwise                                                                               |
| rso_hp                           | HIGH PERFORMING RSO OVERLAP        | 1 if REO has an overlapping high performing RSO, 0 otherwise                                                               |
| lag_reo_mjrival01                | REO RIVALRY                        | 1 if REO is rivalrous, 0 otherwise                                                                                         |
| lag_rso_mjrival01                | RSO RIVALRY                        | 1 if RSO is rivalrous, 0 otherwise                                                                                         |
| lag_gap_mjrival01                | RIVALRY GAP                        | RSO Rivalry – REO Rivalry                                                                                                  |
| lag_gap_mjrival01_nato           | N/A                                | Same as Rivalry Gap, but NATO is coded as rivalrous                                                                        |
| lag_civilwar                     | CONFLICT                           | Sum of all violent conflicts within member-states and between member-states of a given REO (Uppsala Conflict Data Program) |

|                |                 |                                                                                                                                        |
|----------------|-----------------|----------------------------------------------------------------------------------------------------------------------------------------|
| lag_concen     | HEGEMONY        | Value of concentration ratio of a given REO (based on members' GDP, WPT)                                                               |
| lag_delegation | DELEGATION      | Transfer of agenda-setting or decision-making authority to the REO (based on Hooghe et al. 2017)                                       |
| lag_mem        | MEMBERS         | Number of REO's members                                                                                                                |
| lag_ipd_std    | IDEAL POINT STD | Standard deviation of the REO members' ideal point distance, based on UN General Assembly (UNGA) voting patterns (Bailey et al. 2017). |
| southx2        | SOUTH-SOUTH REO | 1 for REOs that include only developing countries, 0 otherwise                                                                         |
